# Supplementary material for: Histone H4 Lysine 12 Acetylation Regulates Telomeric Heterochromatin Plasticity in Saccharomyces cerevisiae
Source: PLOS journal article supplement (doi:10.1371/journal.pgen.1001272), 2011-01-13
Supplement: S9 (10.1371/journal.pgen.1001272.s009) [file journal.pgen.1001272.s009]

**Tables S2. Yeast strains used in this study**

| **Strain** | **Genotype** | **Source** |
| --- | --- | --- |
| **BY4741** | MATa *his3Δ1 leu2Δ0 met15Δ0 ura3Δ* | **[1]** |
| **BY4742** | MAT *his3Δ1 leu2Δ0 lys2 0 ura3Δ* | **[1]** |
| **BY4742** | BY4742 *hat1Δ::KanMX* | **Euroscarf** |
| **BY4743** | BY4743 *ESA1*/*esa1::KanMX* | **Euroscarf** |
| **JQB143** | BY4742 *ESA1-13Myc::HIS3* | **This work** |
| **JQB201** | BY4742 *esa1::KanMX ESA1::LEU2* | **This work** |
| **JQB202** | BY4742 *esa1::KanMX esa1(E338Q)::LEU2* | **This work** |
| **MX1-4C** | MATα *ura3-52 leu2-3,112 trp1-289 his3Δ1Δ* (*hhf1-hht1*) (*hhf2-hht2*)pMS329 [*CEN URA3 HHT1-HHF1*] | **[2]** |
| **NSY429** | MATα *ura3-52 leu2-3,112 trp1-289 his3Δ1Δ* (*hhf1-hht1*) (*hhf2-hht2*)pNS329 [*CEN TRP1 HHT1-HHF1*] | **[3]** |
| **JQB205** | MATα *ura3-52 leu2-3,112 trp1-289 his3Δ1Δ* (*hhf1-hht1*) (*hhf2-hht2*)pNS329 [*CEN TRP1 HHT1- HHF1K5R* ] | **This work** |
| **JQB206** | MATα *ura3-52 leu2-3,112 trp1-289 his3Δ1Δ* (*hhf1-hht1*) (*hhf2-hht2*)pNS329 [*CEN TRP1 HHT1- HHF1K8R* ] | **This work** |
| **JQB207** | MATα *ura3-52 leu2-3,112 trp1-289 his3Δ1Δ* (*hhf1-hht1*) (*hhf2-hht2*)pNS329 [*CEN TRP1 HHT1- HHF1K12R* ] | **This work** |
| **JQB208** | MATα *ura3-52 leu2-3,112 trp1-289 his3Δ1Δ* (*hhf1-hht1*) (*hhf2-hht2*)pNS329 [*CEN TRP1 HHT1- HHF1K16R* ] | **This work** |
| **JQB209** | MATα *ura3-52 leu2-3,112 trp1-289 his3Δ1Δ* (*hhf1-hht1*) (*hhf2-hht2*)pNS329 [*CEN TRP1 HHT1- HHF1K12Q* ] | **This work** |
| **JQB210** | NSY429 *sir2::HIS3* | **This work** |
| **JQB211** | JQB207 *sir2::HIS3* | **This work** |
| **JQB212** | NSY429 *TELXIV::URA3* | **This work** |
| **JQB213** | NSY429 *TELXIV::URA3* *sir2::HIS3* | **This work** |
| **JQB214** | JQB205 *TELXIV::URA3* | **This work** |
| **JQB215** | JQB206 *TELXIV::URA3* | **This work** |
| **JQB216** | JQB207 *TELXIV::URA3* | **This work** |
| **JQB217** | JQB208 *TELXIV::URA3* | **This work** |
| **JQB218** | JQB207 *TELXIV::URA3* *sir2::HIS3* | **This work** |
| **JQB219** | NSY429  *SIR2-13Myc::HIS3* | **This work** |
| **JQB220** | JQB205  *SIR2-13Myc::HIS3* | **This work** |
| **JQB221** | JQB206  *SIR2-13Myc::HIS3* | **This work** |
| **JQB222** | JQB207  *SIR2-13Myc::HIS3* | **This work** |
| **JQB223** | JQB208  *SIR2-13Myc::HIS3* | **This work** |
| **JQB224** | NSY429  *SIR3-13Myc::HIS3* | **This work** |
| **JQB225** | JQB205  *SIR3-13Myc::HIS3* | **This work** |
| **JQB226** | JQB206  *SIR3-13Myc::HIS3* | **This work** |
| **JQB227** | JQB207  *SIR3-13Myc::HIS3* | **This work** |
| **JQB228** | JQB208  *SIR3-13Myc::HIS3* | **This work** |
| **JQB229** | NSY429 *Est2-13Myc::HIS3* | **This work** |
| **JQB230** | JQB207 *Est2-13Myc::HIS3* | **This work** |
| **JQB231** | NSY429 *est2::HIS3* | **This work** |
| **JQB232** | JQB207 *est2::HIS3* | **This work** |
| **JQB233** | JQB207 *est2::HIS3 sir2::URA3* | **This work** |
| **UCC5706** | MATa-inc *ura3–52 lys2–801 ade2–101 trp1-63 his3-200 leu2-1:LEU2-GALHO VII-L::ADE2-TG-HO site-LYS2 rad52::hisG* | **[4]** |
| **JQB234** | MATa-inc *ura3–52 lys2–801 ade2–101 trp1-63 his3-200 leu2-1:LEU2-GALHO VII-L::ADE2-TG-HO site-LYS2 rad52::hisG pRS316 [CEN URA3 RAD52]* | **This work** |
| **JQB235** | MATa-inc *ura3–52 lys2–801 ade2–101 trp1-63 his3-200 leu2-1:LEU2-GALHO VII-L::ADE2-TG-HO site-LYS2 rad52::hisG pRS316 [CEN URA3 RAD52] SIR2-13myc::HIS3* | **This work** |
| **JQB236** | MATa-inc *ura3–52 lys2–801 ade2–101 trp1-63 his3-200 leu2-1:LEU2-GALHO VII-L::ADE2-TG-HO site-LYS2 rad52::hisG pRS316 [CEN URA3 RAD52] SIR3-13myc::HIS3* | **This work** |
| **JQB237** | MATa-inc *ura3–52 lys2–801 ade2–101 trp1-63 his3-200 leu2-1:LEU2-GALHO VII-L::ADE2-TG-HO site-LYS2 rad52::hisG pRS316 [CEN URA3 RAD52] SIR4-13myc::HIS3* | **This work** |

Reference:

1. Brachmann CB, Davies A, Cost GJ, Caputo E, Li J, et al. (1998) Designer deletion strains derived from Saccharomyces cerevisiae S288C: a useful set of strains and plasmids for PCR-mediated gene disruption and other applications. Yeast 14: 115-132.

2. Johnson LM, Kayne PS, Kahn ES, Grunstein M (1990) Genetic evidence for an interaction between SIR3 and histone H4 in the repression of the silent mating loci in Saccharomyces cerevisiae. Proc Natl Acad Sci U S A 87: 6286-6290.

3. Sabet N, Volo S, Yu C, Madigan JP, Morse RH (2004) Genome-wide analysis of the relationship between transcriptional regulation by Rpd3p and the histone H3 and H4 amino termini in budding yeast. Mol Cell Biol 24: 8823-8833.

4. Diede SJ, Gottschling DE (1999) Telomerase-mediated telomere addition in vivo requires DNA primase and DNA polymerases alpha and delta. Cell 99: 723-733.
